# Supplementary material
Source: PubMed Central journal article supplement (PMC3082447)
Supplement: NIHMS264624-supplement-1.pdf [file NIHMS264624-supplement-1.pdf]

**Module 1**

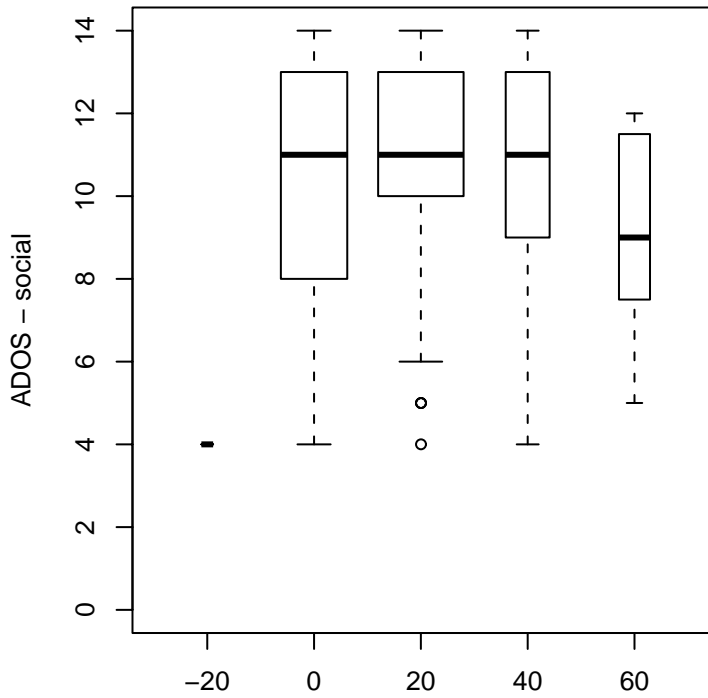

**Module 2**

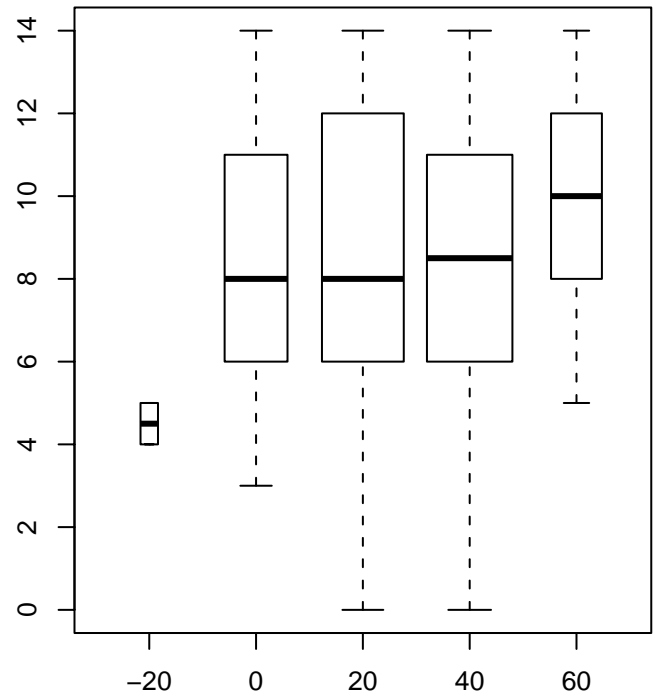

**Module 3**

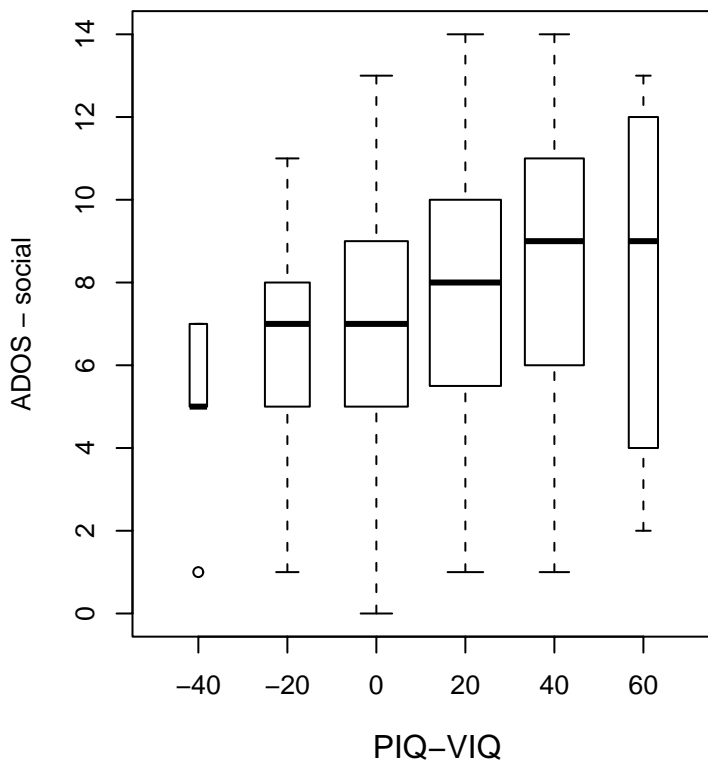

**Module 4**

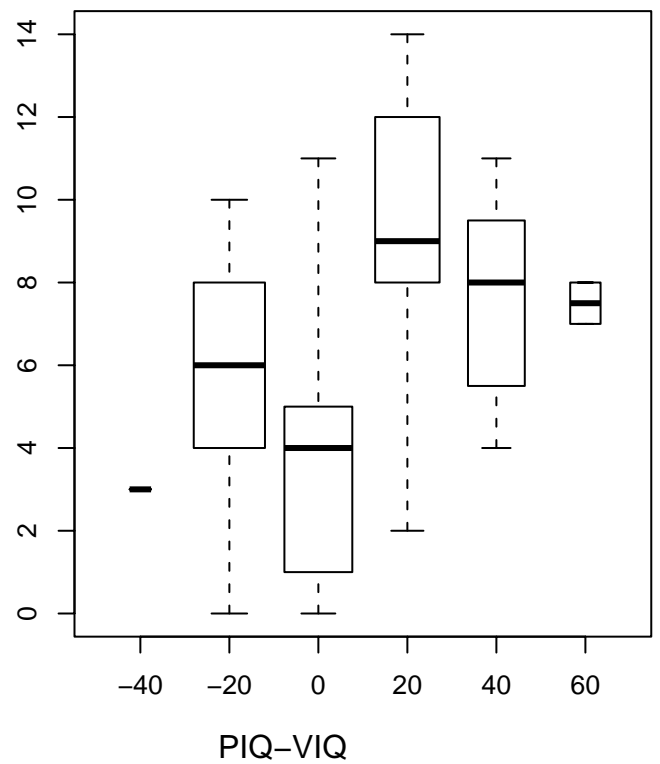

Fig. S1: Boxplots of ADOS social subscales against IQ discrepancy category, according to ADOS module administered. Box widths are proportional to the square root of the number of observations represented in that box.

**Module 1**

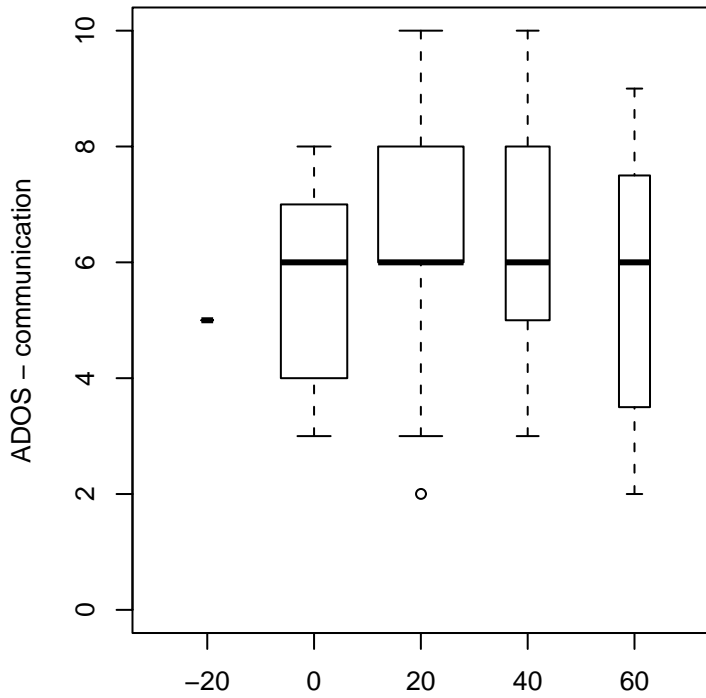

**Module 2**

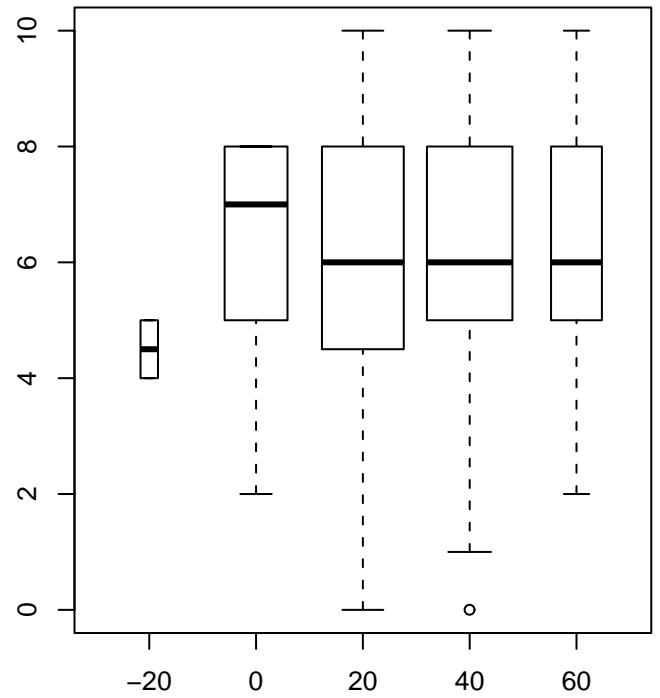

**Module 3**

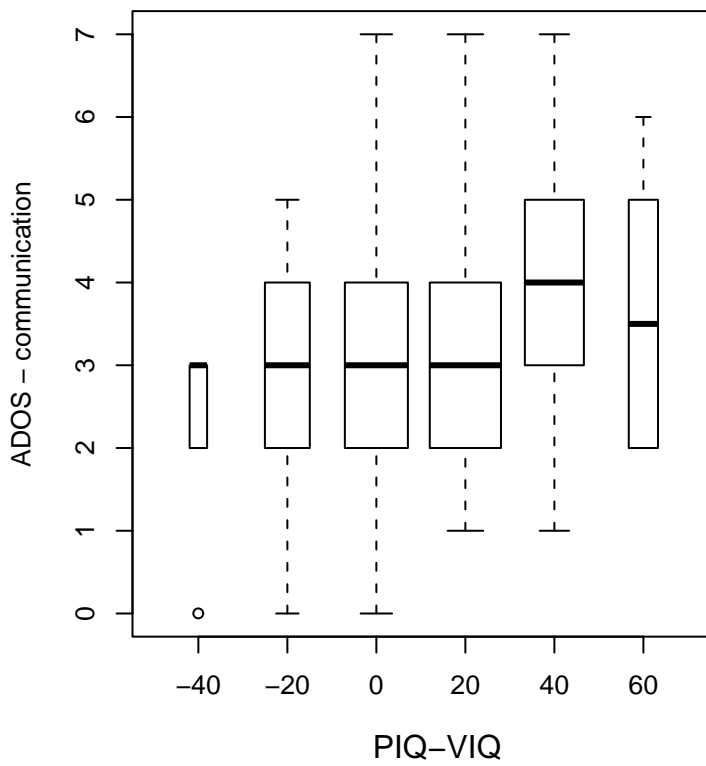

**Module 4**

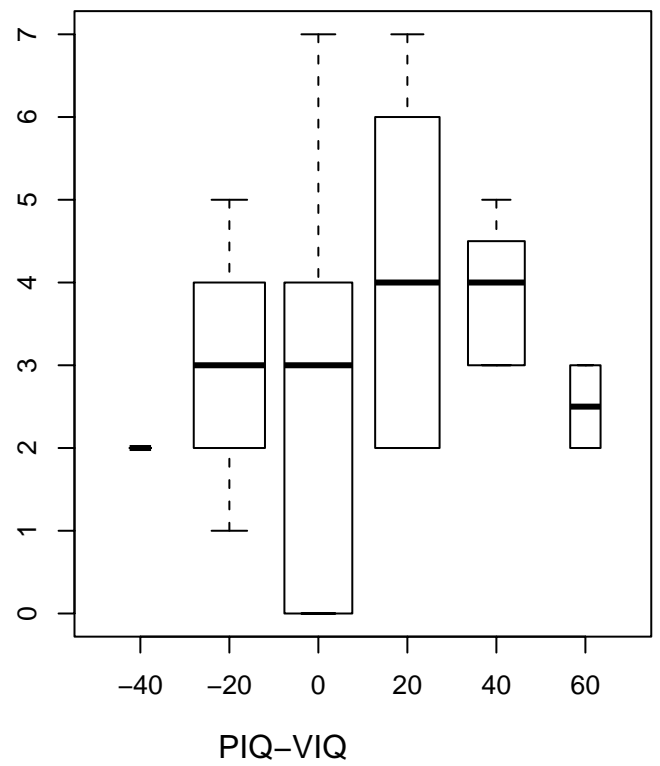

Fig. S2: Boxplots of ADOS communication subscales against IQ discrepancy category, according to ADOS module administered. Box widths are proportional to the square root of the number of observations represented in that box.

**Non-Verbal**

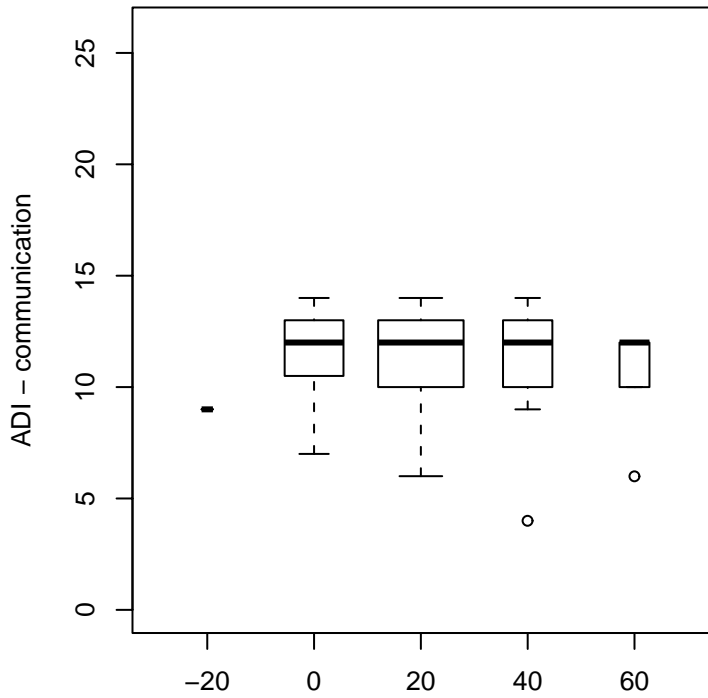

**Verbal**

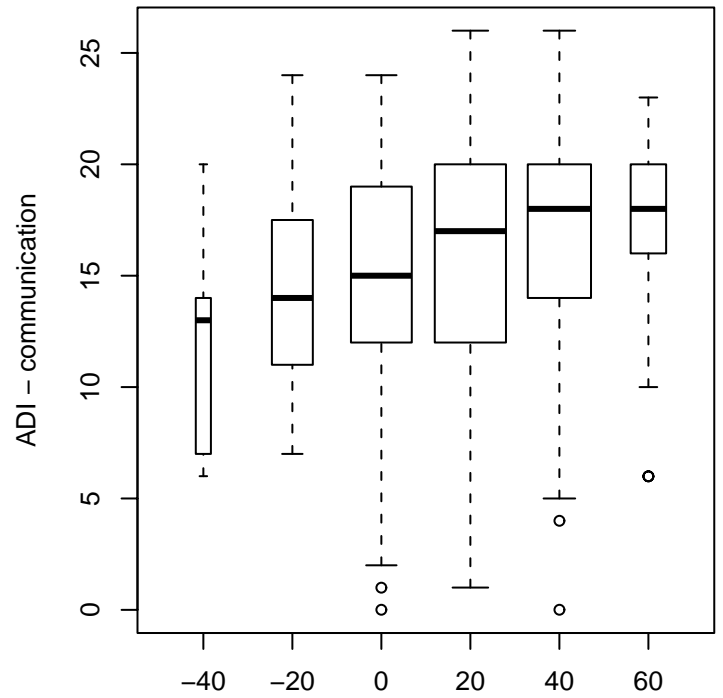

**Non-Verbal**

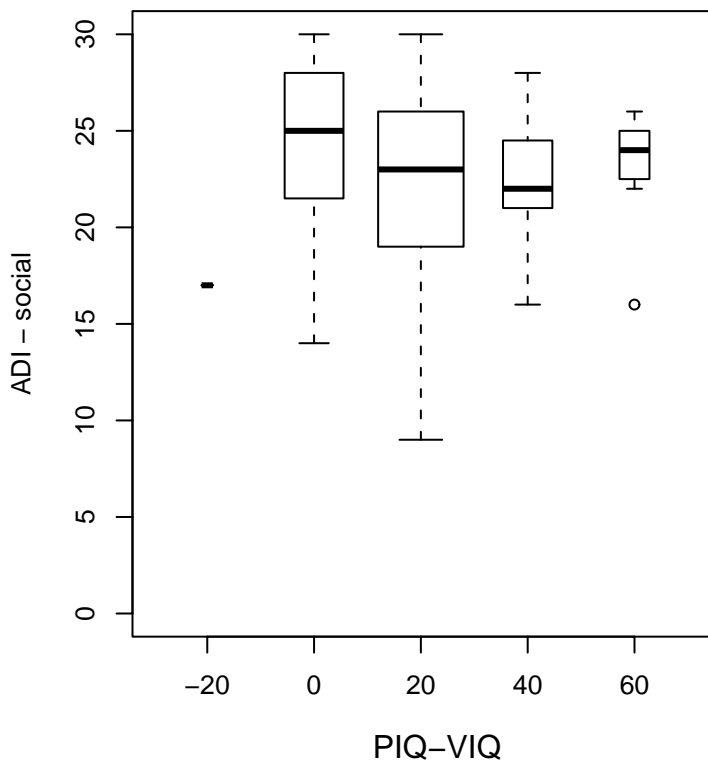

**Verbal**

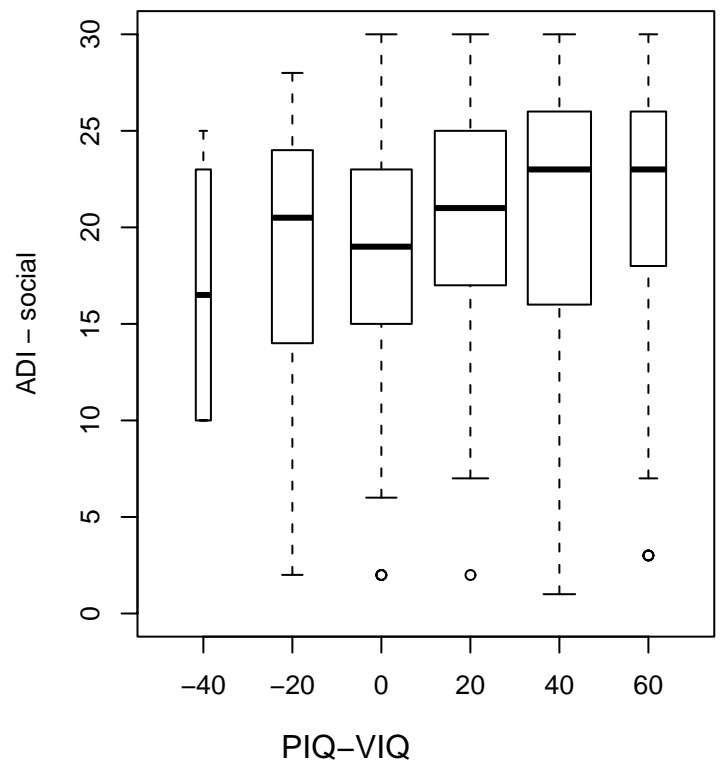

Fig. S3: Boxplots of ADI communication and social subscales against IQ discrepancy category, according to verbal/non-verbal status. Box widths are proportional to the square root of the number of observations represented in that box.
